# Supplementary material for: Comparative transcriptomics reveals the conserved building blocks involved in parallel evolution of diverse phenotypic traits in ants
Source: PubMed Central journal article supplement (PMC4780134; doi:10.1186/s13059-016-0902-7), 2016-03-07
Supplement: 13059_2016_902_MOESM5_ESM.pdf [file 13059_2016_902_MOESM5_ESM.pdf]

| <b>Module</b> | <b>Caste</b> | <b>N° Queens</b> | <b>N° Workers</b> | <b>N° Non DEGs</b> | <b>% DEGs</b> |
|---------------|--------------|------------------|-------------------|--------------------|---------------|
| 1             | Queen        | 51               | 158               | 880                | 23,75         |
| 2             | Queen        | 17               | 455               | 952                | 49,58         |
| 3             | Worker       | 1150             | 363               | 6395               | 23,66         |
| 4             | Queen        | 75               | 179               | 1253               | 20,27         |
| 5             | Queen        | 61               | 86                | 765                | 19,22         |
| 6             | Queen        | 45               | 290               | 1168               | 28,68         |
| 7             | Worker       | 100              | 74                | 1142               | 15,24         |
| 8             | Worker       | 259              | 211               | 2353               | 19,97         |
| 9             | Worker       | 131              | 117               | 1529               | 16,22         |
| 10            | Worker       | 679              | 360               | 6459               | 16,09         |
| 11            | NTA          | 112              | 18                | 878                | 14,81         |
| 12            | Worker       | 205              | 58                | 1298               | 20,26         |
| 13            | Queen        | 134              | 41                | 551                | 31,76         |
| 14            | NTA          | 206              | 616               | 2543               | 32,32         |
| 15            | Queen        | 1307             | 124               | 4194               | 34,12         |
| 16            | Queen        | 116              | 474               | 2849               | 20,71         |
| 17            | Worker       | 9                | 107               | 582                | 19,93         |
| 18            | Queen        | 55               | 29                | 719                | 11,68         |
| 19            | NTA          | 572              | 74                | 1412               | 45,75         |
| 20            | Queen        | 214              | 70                | 1884               | 15,07         |
| 21            | Queen        | 77               | 16                | 729                | 12,76         |
| 22            | Queen        | 173              | 367               | 2087               | 25,87         |
| 23            | Queen        | 82               | 492               | 2448               | 23,45         |
| 24            | Worker       | 150              | 1238              | 4800               | 28,92         |
| 25            | Worker       | 139              | 100               | 1249               | 19,14         |
| 26            | Worker       | 321              | 146               | 2901               | 16,10         |
| 27            | Queen        | 166              | 395               | 2742               | 20,46         |
| 28            | Queen        | 1515             | 138               | 3059               | 54,04         |
| 29            | Queen        | 42               | 38                | 501                | 15,97         |
| 30            | Queen        | 478              | 194               | 5413               | 12,41         |
| 31            | Queen        | 596              | 285               | 5107               | 17,25         |
| 32            | Worker       | 217              | 107               | 1698               | 19,08         |
| 33            | Worker       | 299              | 180               | 1996               | 24,00         |
| 34            | Queen        | 996              | 153               | 4847               | 23,71         |
| 35            | NTA          | 317              | 1106              | 4623               | 30,78         |
| 36            | Worker       | 102              | 604               | 3440               | 20,52         |
