# Supplementary material for: Comparative transcriptomics reveals the conserved building blocks involved in parallel evolution of diverse phenotypic traits in ants
Source: PubMed Central journal article supplement (PMC4780134; doi:10.1186/s13059-016-0902-7), 2016-03-07
Supplement: 13059_2016_902_MOESM6_ESM.pdf [file 13059_2016_902_MOESM6_ESM.pdf]

Average transcript counts

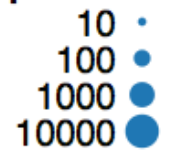

activated cyclic nucleotide-gated channel 2

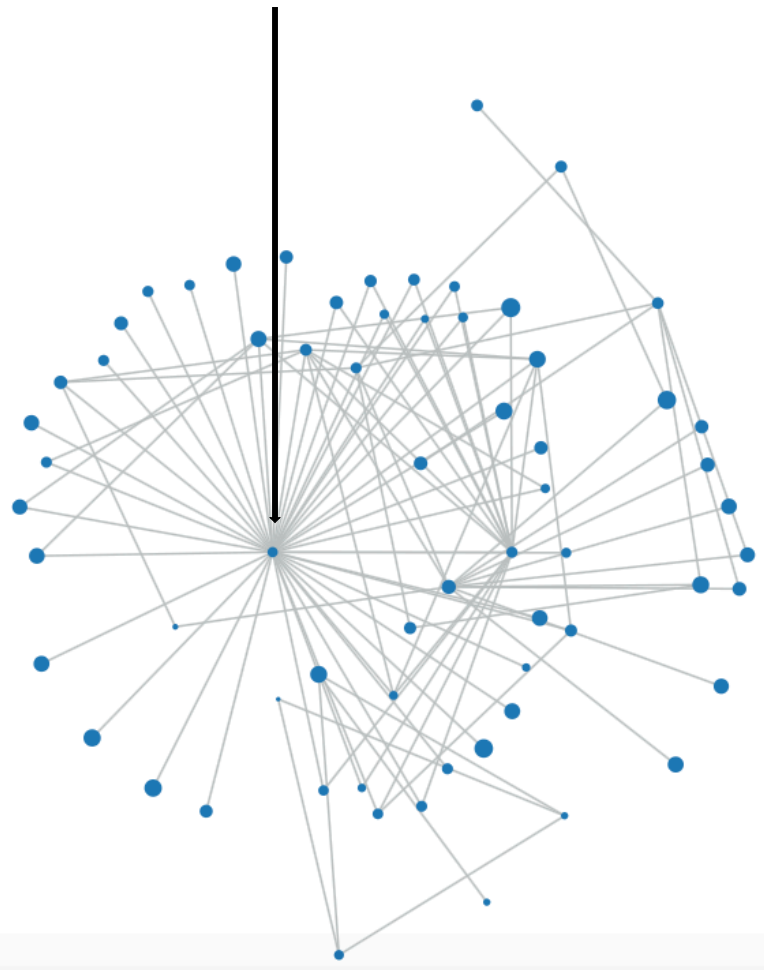

Queen – Module 2

Hypothetical proteins

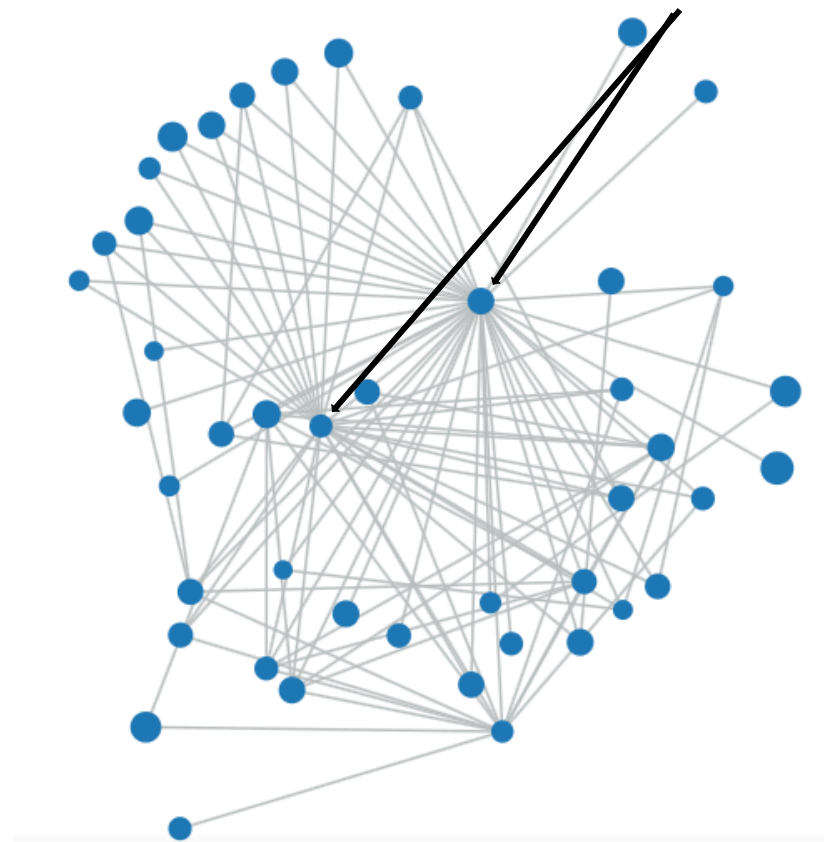

Worker – Module 32
